# Supplementary material
Source: ML conference proceedings conference paper supplement (https://openreview.net/forum?id=rbNL4ILsqeq)

Cohen-Sigma=0.25

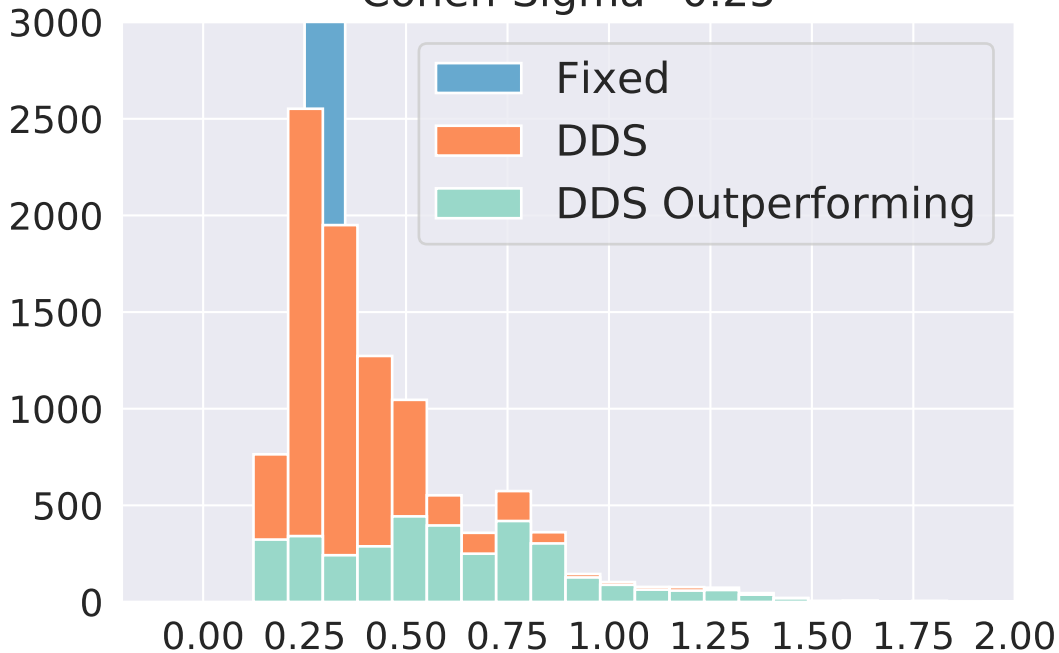

Supplement: supplementary_material [file attachment]
